# Supplementary material for: Model-Based Evaluation of Spontaneous Tumor Regression in Pilocytic Astrocytoma
Source: PubMed Central journal article supplement (PMC4675550; doi:10.1371/journal.pcbi.1004662), 2015-12-10
Supplement: pcbi.1004662.s003.pdf [file pcbi.1004662.s003.pdf]

| residual tumor size (cm <sup>3</sup> ) | outcome                    | reference |
|----------------------------------------|----------------------------|-----------|
| 0.1                                    | tumor regression           | [2]       |
| 0.1                                    | tumor regression           | [1]       |
| 2                                      | tumor regression           | [2]       |
| 2                                      | tumor regression           | [2]       |
| 2                                      | tumor regression           | [2]       |
| 2                                      | tumor regression           | [2]       |
| 2.5                                    | tumor regression           | [1]       |
| 6                                      | tumor regression or stable | [2]       |
| 8.8                                    | tumor regression or stable | [2]       |
| 10                                     | tumor growth               | [2]       |
| 13.6                                   | tumor growth               | [1]       |
| 16.8                                   | tumor growth               | [2]       |
| 43.2                                   | tumor growth               | [2]       |

**Table S1. Residual cerebellar postoperative PA volume and outcome.** This table contains the results of our literature research regarding volumetric data of residual cerebellar PA and the corresponding patient outcome.

## References

1. Smoots D, Geyer J, Lieberman D, Berger M. Predicting disease progression in childhood cerebellar astrocytoma. *Childs Nerv Syst.* 1998;14:636–648.
2. Gunny RS, Hayward RD, Phipps KP, Harding BN, Saunders DE. Spontaneous regression of residual low-grade cerebellar pilocytic astrocytomas in children. *Pediatr Radiol.* 2005;35(11):1086–1091.
