# Supplementary material for: Model-Based Evaluation of Spontaneous Tumor Regression in Pilocytic Astrocytoma
Source: PubMed Central journal article supplement (PMC4675550; doi:10.1371/journal.pcbi.1004662), 2015-12-10
Supplement: pcbi.1004662.s004.pdf [file pcbi.1004662.s004.pdf]

| N   | u         | v                     | $\gamma$ | $\alpha^N(\gamma)$ | $\alpha(\gamma)$ | simulated fraction of absorption |
|-----|-----------|-----------------------|----------|--------------------|------------------|----------------------------------|
| 10  | $10^{-4}$ | $2500^{-1}$           | 0.04     | 0.9649             | 0.96117          | 0.9632                           |
| 100 | $10^{-4}$ | $2500^{-1}$           | 4        | 0.09               | 0.0885           | 0.0921                           |
| 10  | $10^{-4}$ | $10000^{-1}$          | 0.01     | 0.9911             | 0.9901           | 0.9912                           |
| 100 | $10^{-4}$ | $10000^{-1}$          | 1        | 0.4417             | 0.4387           | 0.4419                           |
| 10  | $10^{-4}$ | $1.52 \times 10^{-3}$ | 0.152    | 0.8759             | 0.8636           | 0.882                            |
| 100 | $10^{-4}$ | $1.52 \times 10^{-5}$ | 0.152    | 0.8649             | 0.8636           | 0.8665                           |

**Table S2. Comparison of theoretical absorption probabilities and simulation results.** This table shows the exact absorption probabilities  $\alpha^N(\gamma)$  in state  $N$  in comparison with the results from 10000 simulations of trajectories of the process  $(X_t)_{t \geq 0}$  and the asymptotic absorption probabilities  $\alpha(\gamma)$ . One can see that the asymptotic values are in good accordance with both, the exact theoretical values and the simulation results. Furthermore, the asymptotic result  $\alpha(\gamma)$  is a good approximation even for small  $N$ .
